# Supplementary material for: The Association between Malnutrition and Oral Health in Older People: A Systematic Review
Source: MDPI journal article supplement (doi:10.3390/nu13103584), 2021-10-13
Supplement: s1 [file s1]

# The association between malnutrition and oral health in older people: A systematic review

**Supplementary Table S1.** Methodological quality assessment of the included studies

| First author          | Representative-<br>ness of sample | Sample size | Ascertainment of<br>exposure | Non- respondents | Comparability/ controlling for<br>confounding | Assessment of<br>outcome | Statistical test | Overall quality<br>score |
|-----------------------|-----------------------------------|-------------|------------------------------|------------------|-----------------------------------------------|--------------------------|------------------|--------------------------|
| Andersson             | *                                 | *           | **                           | *                | *                                             | **                       | *                | 9                        |
| Bøhmer <sup>1</sup>   | *                                 | *           | **                           | -                | -                                             | **                       | -                | 6                        |
| El Osta               | *                                 | *           | **                           | *                | **                                            | *                        | *                | 9                        |
| Huppertz              | *                                 | *           | **                           | *                | **                                            | *                        | *                | 9                        |
| Kiesswetter           | *                                 | *           | *                            | *                | **                                            | *                        | *                | 8                        |
| Lindmark              | -                                 | *           | **                           | *                | *                                             | **                       | *                | 8                        |
| Mesas                 | *                                 | *           | **                           | *                | **                                            | **                       | *                | 10                       |
| Pavlović <sup>2</sup> | *                                 | *           | *                            | -                | -                                             | **                       | -                | 5                        |
| Poisson               | *                                 | *           | **                           | -                | **                                            | **                       | *                | 9                        |
| Samnieng              | *                                 | *           | **                           | -                | **                                            | **                       | *                | 9                        |
| Soini                 | *                                 | *           | **                           | *                | *                                             | **                       | *                | 9                        |
| Takahashi             | *                                 | *           | **                           | -                | **                                            | **                       | *                | 9                        |

<sup>1,2</sup> excluded for further analyses due to moderate methodological quality score
